# Supplementary material for: A green self-assembled organic supermolecule as an effective flame retardant for epoxy resin
Source: Royal Society of Chemistry journal article supplement (doi:10.1039/d0ra00072h), 2020-01-01
Supplement: d0ra00072h1.pdf [file d0ra00072h1.pdf]

## Supporting information

### 3. Results and discussion

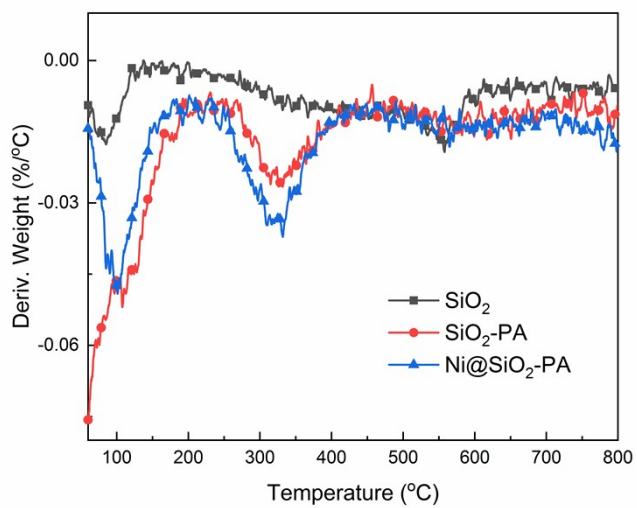

**Fig. S1** DTG curves of SiO<sub>2</sub>, SiO<sub>2</sub>-PA and Ni@SiO<sub>2</sub>-PA under N<sub>2</sub> atmosphere.
